# Supplementary material for: pH-responsive star polymer nanoparticles: potential 19F MRI contrast agents for tumour-selective imaging
Source: Royal Society of Chemistry journal article supplement (doi:10.1039/c3py00654a), 2013-01-01
Supplement: c3py00654a.pdf [file c3py00654a.pdf]

## Supplementary Information

# pH-Responsive Star Polymer Nanoparticles: Potential $^{19}\text{F}$ MRI Contrast Agents for Tumour-selective Imaging

Kewei Wang, Hui Peng, Kristofer J. Thurecht, Simon Puttick and Andrew K. Whittaker\*

Australian Institute for Bioengineering and Nanotechnology, The

University of Queensland, St Lucia, 4072, Australia

E-mail: [a.whittaker@uq.edu.au](mailto:a.whittaker@uq.edu.au);

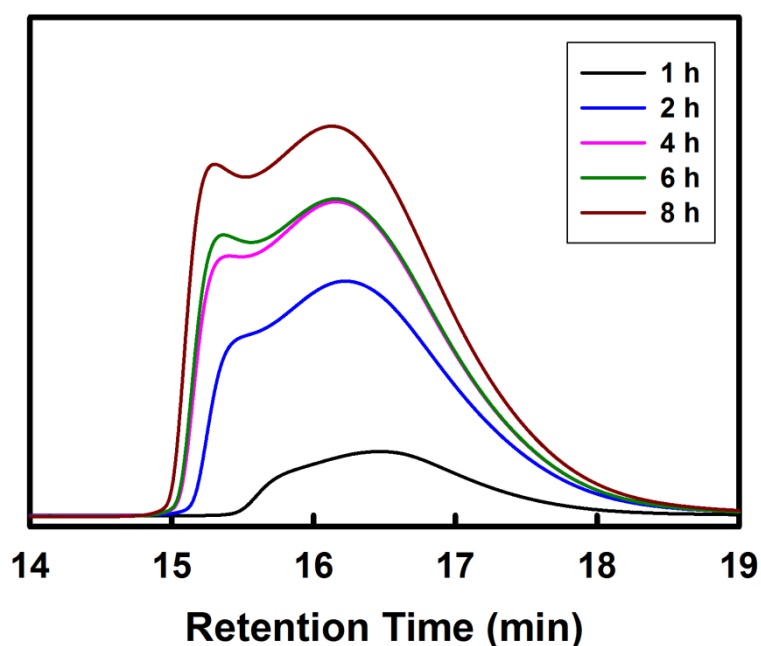

Fig. S1 GPC curves of the synthesis of PPEGMA using S-1-dodecyl-S'-( $\alpha,\alpha'$ -dimethyl- $\alpha''$ -acetic acid) trithiocarbonate as CTA. [PEGMA] : [CTA] : [AIBN] = 50:1:0.1, 70 °C, [PEGMA] = 1 M in toluene.

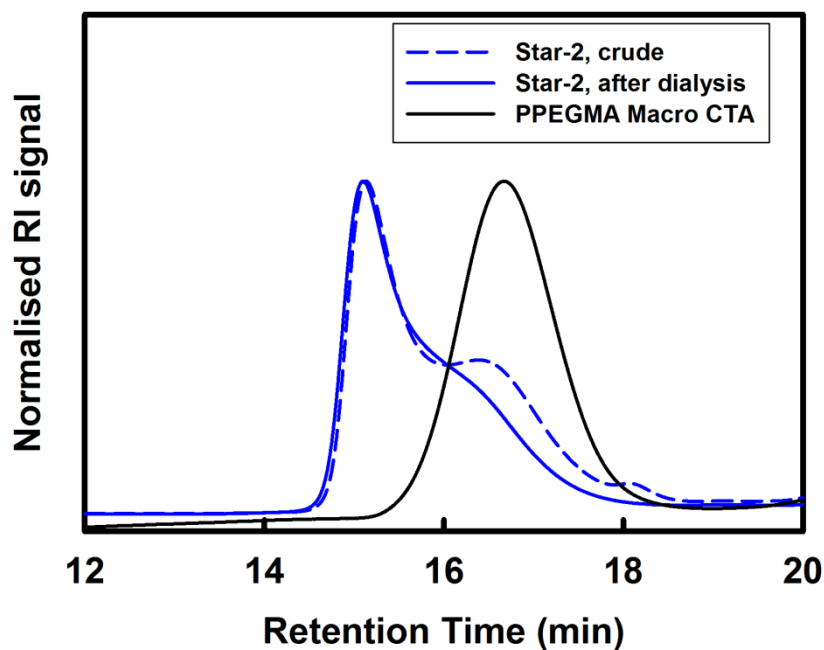

Fig. S2 GPC traces of Star-2 before and after dialysis. [Macro-CTA] : [TFEA] : [DMAEMA] : [EGDMA] : [AIBN] = 1 : 8 : 24 : 8 : 0.2. Polymerised in THF at 70 °C for 24 h, [monomer] = 0.5 M.

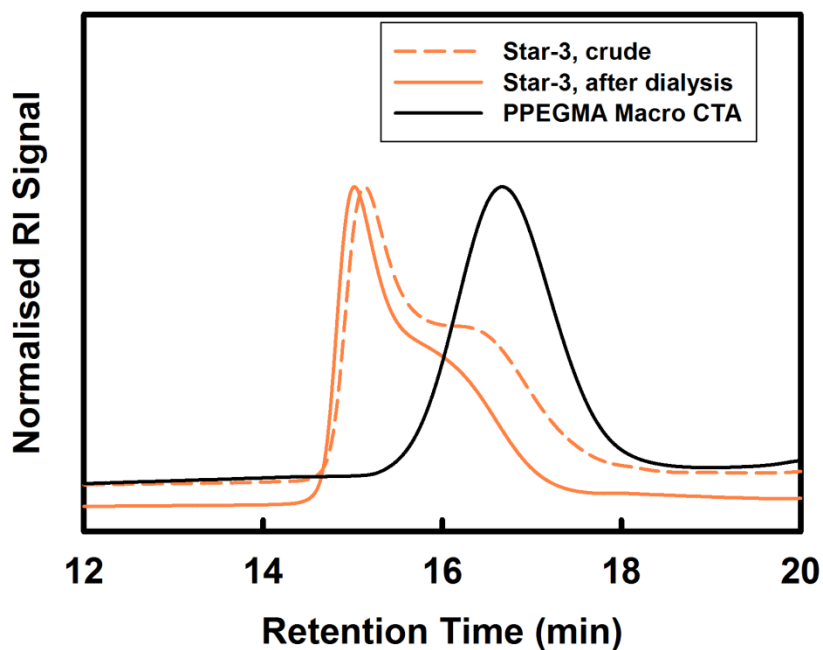

Fig. S3 GPC traces of Star-3 before and after dialysis. [Macro-CTA] : [TFEA] : [DMAEMA] : [EGDMA] : [AIBN] = 1 : 16 : 16 : 8 : 0.2. Polymerised in THF at 70 °C for 24 h, [monomer] = 0.5 M.
